# Supplementary material
Source: PubMed Central journal article supplement (PMC8979582)
Supplement: NIHMS1785242-supplement-SI.pdf [file NIHMS1785242-supplement-SI.pdf]

# Violations. How Nature Circumvents the Woodward-Hoffmann Rules and Promotes the Forbidden Conrotatory $4n+2$ Electron Electrocyclization of Prinzbach's Vinylogous Sesquifulvalene

Garrett A. Kukier, Aneta Turlik, Xiaosong Xue, and K. N. Houk\*

houk@chem.ucla.edu

Department of Chemistry and Biochemistry, University of California, Los Angeles, California  
90095-1569, United States

## Table of Contents

|                                                |    |
|------------------------------------------------|----|
| 1. DFT Calculations .....                      | 2  |
| 1.1 Summary of Energies.....                   | 2  |
| 1.2 Coordinates .....                          | 4  |
| 2. References for Supporting Information ..... | 51 |

## 1. DFT Calculations

Density functional theory (DFT) calculations were performed with Gaussian 16.<sup>1</sup> Optimization of molecular geometries and subsequent frequency calculations were performed with the  $\omega$ B97X-D functional,<sup>2</sup> and the 6-31G(d) basis set.<sup>3</sup> Frequency calculations were used to confirm the optimized structures as minima (zero imaginary frequencies) or transition states (one imaginary frequency) on the potential energy surface. Transition state structures were confirmed by intrinsic reaction coordinate (IRC) calculations to connect the appropriate starting geometries and products. Single point energies were calculated for each structure using the  $\omega$ B97X-D/6-311++G(d,p) level of theory, and were supplemented by quasi-harmonic corrections from the GoodVibes program.<sup>4</sup> PyMol 2.3.5.<sup>5</sup> was used to render 3D-like visualizations of optimized geometries. Initial structures were generated in GaussView 6.0.16.<sup>6</sup>

### 1.1 Summary of Energies

| Structure         | E_SPC<br>(au) | qh-H_SPC<br>(au) | T.qh-S<br>(au) | qh-<br>G(T)_SPC<br>(au) | qh-<br>G(T)_SPC<br>(kcal/mol) |
|-------------------|---------------|------------------|----------------|-------------------------|-------------------------------|
| <b>Figure 1a</b>  |               |                  |                |                         |                               |
| s-trans-1         | -540.54672    | -540.31948       | 0.05046        | -540.36994              | -339087.0                     |
| s-cis-1           | -540.54227    | -540.31509       | 0.04920        | -540.36429              | -339083.5                     |
| 2-trans           | -540.57089    | -540.34252       | 0.04640        | -540.38892              | -339098.9                     |
| 2-cis             | -540.57668    | -540.34819       | 0.04606        | -540.39425              | -339102.3                     |
| <b>Figure 2</b>   |               |                  |                |                         |                               |
| 9                 | -1000.28574   | -999.93013       | 0.06108        | -999.99120              | -627503.5                     |
| 9-TS              | -1000.25954   | -999.90765       | 0.05950        | -999.96715              | -627488.4                     |
| 10                | -1000.31689   | -999.96000       | 0.05846        | -1000.01845             | -627520.6                     |
| des-Ph-11         | -1076.49994   | -1076.13091      | 0.06231        | -1076.19322             | -675320.9                     |
| des-Ph-11-conTS   | -1076.46800   | -1076.10311      | 0.06029        | -1076.16340             | -675302.2                     |
| des-Ph-11-disTS   | -1076.45698   | -1076.08928      | 0.06089        | -1076.15017             | -675293.9                     |
| des-Ph-12         | -1076.52990   | -1076.15945      | 0.05995        | -1076.21941             | -675337.4                     |
| des-Ph-12-synprod | -1076.51109   | -1076.14074      | 0.06052        | -1076.20125             | -675326.0                     |
| <b>Figure 3a</b>  |               |                  |                |                         |                               |
| 13                | -233.36871    | -233.24090       | 0.03772        | -233.27861              | -146384.4                     |
| TS-1a             | -233.29178    | -233.16942       | 0.03541        | -233.20483              | -146338.1                     |
| TS-1b             | -233.32055    | -233.19385       | 0.03508        | -233.22893              | -146353.3                     |
| 14                | -233.39901    | -233.26883       | 0.03430        | -233.30313              | -146399.8                     |
| <b>Figure 3b</b>  |               |                  |                |                         |                               |
| 15                | -540.64022    | -540.41126       | 0.04816        | -540.45942              | -339143.1                     |
| TS-2a             | -540.54544    | -540.32160       | 0.04632        | -540.36792              | -339085.7                     |
| TS-2b             | -540.55064    | -540.32368       | 0.04599        | -540.36967              | -339086.8                     |

|                   |            |            |         |            |           |
|-------------------|------------|------------|---------|------------|-----------|
| 16                | -540.58156 | -540.35306 | 0.04570 | -540.39876 | -339105.1 |
| 17                | -540.57033 | -540.34178 | 0.04628 | -540.38806 | -339098.4 |
| <b>Figure 5</b>   |            |            |         |            |           |
| TS-3a             | -540.50671 | -540.28171 | 0.04714 | -540.32885 | -339061.2 |
| TS-3b             | -540.48844 | -540.26343 | 0.04753 | -540.31096 | -339050.0 |
| <b>Figure 6/7</b> |            |            |         |            |           |
| TS-4              | -540.53550 | -540.30965 | 0.04846 | -540.35811 | -339079.6 |
| TS-5a             | -540.49441 | -540.26866 | 0.04684 | -540.31549 | -339052.8 |
| TS-5b             | -540.49352 | -540.26883 | 0.04732 | -540.31615 | -339053.2 |
| TS-6a             | -540.50539 | -540.28053 | 0.04690 | -540.32742 | -339060.3 |
| 18                | -540.50961 | -540.28349 | 0.04756 | -540.33105 | -339062.6 |
| 19                | -540.55781 | -540.33027 | 0.04717 | -540.37744 | -339091.7 |
| 20                | -540.54340 | -540.31615 | 0.04662 | -540.36277 | -339082.5 |
| <b>Figure 8</b>   |            |            |         |            |           |
| 21                | -540.61985 | -540.39087 | 0.04651 | -540.43738 | -339129.3 |
| <b>Figure 9a</b>  |            |            |         |            |           |
| s-trans-22        | -463.14555 | -462.95569 | 0.04593 | -463.00162 | -290537.7 |
| s-cis-22          | -463.14069 | -462.95080 | 0.04547 | -462.99627 | -290534.3 |
| TS-7a             | -463.11108 | -462.92282 | 0.04310 | -462.96593 | -290515.3 |
| TS-7b             | -463.06529 | -462.87733 | 0.04228 | -462.91961 | -290486.2 |
| <b>Figure 9b</b>  |            |            |         |            |           |
| s-trans-23        | -617.94354 | -617.67945 | 0.05380 | -617.73325 | -387633.2 |
| s-cis-23          | -617.94338 | -617.67944 | 0.05280 | -617.73224 | -387632.5 |
| TS-8a             | -617.90257 | -617.64060 | 0.05044 | -617.69104 | -387606.7 |
| TS-8b             | -617.86290 | -617.60205 | 0.05072 | -617.65277 | -387582.7 |
| <b>Figure 10</b>  |            |            |         |            |           |
| 24                | -540.48884 | -540.27003 | 0.04916 | -540.31919 | -339055.2 |
| <b>Figure 11</b>  |            |            |         |            |           |
| SOSP              | -540.49715 | -540.27082 | 0.04627 | -540.31709 | -339053.8 |
| <b>Figure 15</b>  |            |            |         |            |           |
| s-trans-25        | -385.66788 | -385.51619 | 0.04311 | -385.55930 | -241941.9 |
| s-cis-25          | -385.66426 | -385.51245 | 0.04280 | -385.55525 | -241939.4 |
| TS-9a             | -385.62661 | -385.47654 | 0.04020 | -385.51674 | -241915.2 |
| TS-9b             | -385.61289 | -385.46241 | 0.04042 | -385.50283 | -241906.5 |
| <b>Figure 16</b>  |            |            |         |            |           |
| s-cis-26          | -436.33333 | -436.16764 | 0.04727 | -436.21492 | -273728.8 |
| TS-10a            | -436.28486 | -436.12090 | 0.04408 | -436.16498 | -273697.5 |
| TS-10b            | -436.28508 | -436.12089 | 0.04441 | -436.16530 | -273697.7 |

## 1.2 Coordinates

Fig1a-s-trans-1

|   |           |           |           |
|---|-----------|-----------|-----------|
| C | -4.236077 | 0.873081  | 0.044703  |
| C | -4.417061 | -0.464750 | 0.058338  |
| C | -3.403056 | -1.492044 | 0.005671  |
| C | -2.985841 | 1.594337  | -0.028281 |
| C | -2.056831 | -1.382738 | -0.031677 |
| C | -1.712516 | 1.142749  | -0.060724 |
| C | -1.179272 | -0.215650 | -0.029522 |
| H | -5.126834 | 1.495222  | 0.084929  |
| H | -5.441241 | -0.826421 | 0.109112  |
| H | -3.789860 | -2.508625 | 0.000517  |
| H | -3.095770 | 2.676196  | -0.060782 |
| H | -1.515511 | -2.326898 | -0.063030 |
| H | -0.959835 | 1.922617  | -0.121028 |
| C | 0.170015  | -0.459118 | -0.015457 |
| C | 1.234617  | 0.500851  | -0.000032 |
| H | 0.477590  | -1.501984 | -0.009359 |
| C | 2.560570  | 0.202682  | 0.005620  |
| C | 3.639563  | 1.192461  | 0.027098  |
| C | 3.210673  | -1.110315 | -0.007870 |
| C | 4.819553  | 0.530661  | 0.026358  |
| C | 4.549446  | -0.909318 | 0.004345  |
| H | 5.808399  | 0.973598  | 0.039698  |
| H | 5.312300  | -1.679375 | -0.001261 |
| H | 0.981840  | 1.559083  | 0.014179  |
| H | 3.484377  | 2.264662  | 0.041055  |
| H | 2.701853  | -2.065406 | -0.025459 |

Fig1a-s-cis-1

|   |           |           |           |
|---|-----------|-----------|-----------|
| C | 2.957913  | 1.667559  | -0.194922 |
| C | 3.764804  | 0.727879  | 0.342659  |
| C | 3.509746  | -0.691237 | 0.447141  |
| C | 1.657354  | 1.468660  | -0.794546 |
| C | 2.365931  | -1.379033 | 0.244132  |
| C | 0.844704  | 0.391180  | -0.758540 |
| C | 1.026962  | -0.907910 | -0.113475 |
| H | 3.332116  | 2.688345  | -0.222693 |
| H | 4.733679  | 1.054816  | 0.712654  |
| H | 4.367016  | -1.284600 | 0.758286  |
| H | 1.274031  | 2.326921  | -1.342337 |
| H | 2.425098  | -2.454106 | 0.407721  |
| H | -0.102423 | 0.494354  | -1.281693 |
| C | -0.007163 | -1.788676 | 0.033270  |
| C | -1.416801 | -1.603769 | -0.240675 |
| H | 0.257339  | -2.800216 | 0.340364  |
| C | -2.208638 | -0.526781 | -0.010217 |
| C | -3.627053 | -0.447767 | -0.383730 |
| C | -1.901251 | 0.727796  | 0.686011  |
| C | -4.106385 | 0.745020  | 0.032039  |
| C | -3.028263 | 1.474721  | 0.709499  |
| H | -5.116386 | 1.115763  | -0.097204 |
| H | -3.139726 | 2.449922  | 1.169432  |
| H | -1.916215 | -2.485336 | -0.646596 |
| H | -4.160744 | -1.224669 | -0.917770 |
| H | -0.944953 | 0.972956  | 1.127958  |

Fig1a-2-trans

|   |           |           |          |
|---|-----------|-----------|----------|
| C | -1.181348 | -0.568363 | 0.391746 |
| C | -2.058612 | 0.617719  | 0.107466 |

|   |           |           |           |
|---|-----------|-----------|-----------|
| C | -1.523779 | 1.931083  | 0.379139  |
| C | -0.186253 | 2.100284  | 0.429431  |
| C | 0.764605  | 1.042038  | 0.090897  |
| C | 0.283981  | -0.399153 | -0.051639 |
| C | -1.971821 | -1.720190 | -0.158857 |
| C | -3.165237 | -1.263550 | -0.586092 |
| C | -3.228807 | 0.188962  | -0.416561 |
| H | -2.193865 | 2.777073  | 0.507203  |
| H | 0.225778  | 3.089989  | 0.611925  |
| H | -1.634081 | -2.749739 | -0.146254 |
| H | -4.071774 | 0.809830  | -0.699931 |
| H | -3.968974 | -1.865136 | -0.996329 |
| C | 2.024574  | 1.387600  | -0.277693 |
| C | 1.169343  | -1.313765 | 0.763128  |
| H | 0.694203  | -1.855520 | 1.579678  |
| H | 2.268396  | 2.449326  | -0.271946 |
| C | 2.471402  | -1.529948 | 0.519356  |
| C | 3.075003  | 0.517812  | -0.750731 |
| H | 2.986825  | -2.293847 | 1.098976  |
| C | 3.274920  | -0.783058 | -0.422822 |
| H | 3.833397  | 0.997088  | -1.367249 |
| H | 4.177353  | -1.264612 | -0.793554 |
| H | 0.371923  | -0.670622 | -1.114752 |
| H | -1.177006 | -0.668658 | 1.491640  |

Fig1a-2-cis

|   |          |           |           |
|---|----------|-----------|-----------|
| C | 1.887013 | -1.587710 | 0.884245  |
| C | 3.045417 | -1.118546 | 0.161392  |
| C | 3.203664 | 0.128969  | -0.370263 |
| C | 0.625281 | -1.168408 | 0.660237  |

|   |           |           |           |
|---|-----------|-----------|-----------|
| C | 2.253324  | 1.206159  | -0.288252 |
| C | 0.307414  | -0.306940 | -0.527621 |
| C | 0.902934  | 1.057796  | -0.224525 |
| H | 2.068627  | -2.307686 | 1.680001  |
| H | 3.917176  | -1.770187 | 0.161819  |
| H | 4.191286  | 0.382355  | -0.751416 |
| H | -0.186700 | -1.458335 | 1.323584  |
| H | 2.667542  | 2.210413  | -0.205810 |
| C | 0.033076  | 2.148647  | 0.195619  |
| C | -1.290578 | 1.984638  | 0.409755  |
| H | 0.507793  | 3.099326  | 0.426673  |
| C | -1.904921 | 0.713888  | 0.103319  |
| C | -3.019217 | 0.099353  | 0.563525  |
| C | -1.190296 | -0.210752 | -0.845218 |
| C | -3.078968 | -1.253113 | 0.007975  |
| C | -2.011747 | -1.466065 | -0.787478 |
| H | -3.873319 | -1.962197 | 0.214217  |
| H | -1.789334 | -2.364126 | -1.351249 |
| H | -1.885998 | 2.784755  | 0.841027  |
| H | -3.742529 | 0.516169  | 1.256213  |
| H | 0.836354  | -0.719510 | -1.397101 |
| H | -1.285279 | 0.221529  | -1.854208 |

Fig2-9

|   |           |           |           |
|---|-----------|-----------|-----------|
| C | -5.672786 | -0.035778 | -0.473684 |
| C | -5.098408 | -1.149466 | 0.084273  |
| C | -3.718028 | -1.163613 | 0.420554  |
| C | -2.923214 | -0.021738 | 0.127630  |
| C | -3.554224 | 1.145220  | -0.397113 |
| C | -4.903486 | 1.122954  | -0.695475 |

|   |           |           |           |
|---|-----------|-----------|-----------|
| C | -2.752119 | 2.342721  | -0.536417 |
| C | -1.428627 | 2.350062  | -0.279905 |
| C | -0.695034 | 1.138132  | 0.040860  |
| C | -1.523335 | -0.027059 | 0.415147  |
| C | 0.695044  | 1.138128  | -0.040802 |
| C | 1.428647  | 2.350058  | 0.279940  |
| C | 1.523332  | -0.027064 | -0.415107 |
| C | 1.015592  | -1.092847 | -1.145618 |
| C | -1.015624 | -1.092840 | 1.145679  |
| C | -1.804249 | -2.209394 | 1.460662  |
| C | -3.121887 | -2.267571 | 1.073688  |
| C | 2.923217  | -0.021747 | -0.127630 |
| C | 3.554244  | 1.145211  | 0.397096  |
| C | 2.752146  | 2.342714  | 0.536420  |
| C | 3.718019  | -1.163625 | -0.420574 |
| C | 5.098409  | -1.149481 | -0.084331 |
| C | 5.672805  | -0.035794 | 0.473608  |
| C | 4.903514  | 1.122940  | 0.695420  |
| C | 3.121855  | -2.267582 | -1.073688 |
| C | 1.804204  | -2.209404 | -1.460620 |
| H | 0.022876  | -1.080687 | 1.456788  |
| H | -1.359174 | -3.033326 | 2.010227  |
| H | 3.728470  | -3.141176 | -1.296956 |
| H | 1.359108  | -3.033339 | -2.010164 |
| H | 3.243375  | 3.249313  | 0.879952  |
| H | 5.377624  | 2.018282  | 1.089128  |
| H | 6.729999  | -0.032702 | 0.721288  |
| H | 5.695997  | -2.032447 | -0.294852 |
| H | -3.728513 | -3.141162 | 1.296941  |
| H | -3.243338 | 3.249320  | -0.879967 |



|   |           |           |           |
|---|-----------|-----------|-----------|
| H | -5.377582 | 2.018297  | -1.089197 |
| H | -6.729973 | -0.032684 | -0.721393 |
| H | -5.696006 | -2.032429 | 0.294779  |
| H | -0.022923 | -1.080693 | -1.456683 |
| H | 0.875566  | 3.263297  | 0.466878  |
| H | -0.875538 | 3.263298  | -0.466840 |

Fig2-9-TS

|   |           |           |           |
|---|-----------|-----------|-----------|
| C | -2.847146 | 2.365191  | -0.556857 |
| C | -1.473441 | 2.406636  | -0.455970 |
| C | -0.741043 | 1.293164  | -0.010997 |
| C | -1.422559 | 0.123415  | 0.369877  |
| C | -2.826440 | 0.035806  | 0.171762  |
| C | -3.554940 | 1.174322  | -0.272589 |
| C | 1.473441  | 2.406636  | 0.455970  |
| C | 0.741043  | 1.293164  | 0.010997  |
| C | 2.847146  | 2.365191  | 0.556857  |
| C | 3.554940  | 1.174322  | 0.272589  |
| C | 2.826440  | 0.035806  | -0.171762 |
| C | 1.422559  | 0.123415  | -0.369877 |
| C | 3.511684  | -1.202153 | -0.385080 |
| C | 2.745883  | -2.354898 | -0.786708 |
| C | 1.408499  | -2.268560 | -1.029098 |
| C | 0.688606  | -1.050383 | -0.836655 |
| C | 4.959754  | 1.068268  | 0.447334  |
| C | 5.606862  | -0.124868 | 0.219553  |
| C | 4.886669  | -1.260856 | -0.184848 |
| C | -3.511684 | -1.202153 | 0.385080  |
| C | -2.745883 | -2.354898 | 0.786708  |
| C | -1.408499 | -2.268560 | 1.029098  |

|   |           |           |           |
|---|-----------|-----------|-----------|
| C | -0.688606 | -1.050383 | 0.836655  |
| H | 0.177345  | -0.889220 | 1.469687  |
| H | -0.863832 | -3.135241 | 1.392947  |
| H | 3.272513  | -3.294093 | -0.935371 |
| H | 0.863832  | -3.135241 | -1.392947 |
| H | -0.177345 | -0.889220 | -1.469687 |
| H | 3.397251  | 3.237522  | 0.899195  |
| H | 5.514638  | 1.942882  | 0.776117  |
| H | 6.680988  | -0.195646 | 0.362575  |
| H | 5.406495  | -2.202476 | -0.341090 |
| H | -3.272513 | -3.294093 | 0.935371  |
| C | -4.886669 | -1.260856 | 0.184848  |
| C | -4.959754 | 1.068268  | -0.447334 |
| H | -3.397251 | 3.237522  | -0.899195 |
| C | -5.606862 | -0.124868 | -0.219553 |
| H | -5.514638 | 1.942882  | -0.776117 |
| H | -6.680988 | -0.195646 | -0.362575 |
| H | -5.406495 | -2.202476 | 0.341090  |
| H | -0.938701 | 3.305762  | -0.749830 |
| H | 0.938701  | 3.305762  | 0.749830  |

Fig2-10

|   |           |           |           |
|---|-----------|-----------|-----------|
| C | -0.353713 | 2.842946  | -2.434413 |
| C | -0.306248 | 1.475341  | -2.447805 |
| C | -0.035508 | 0.738602  | -1.267124 |
| C | 0.166929  | 1.417353  | -0.074668 |
| C | 0.083044  | 2.833053  | -0.035670 |
| C | -0.163447 | 3.561008  | -1.228909 |
| C | 0.306248  | -1.475341 | -2.447805 |
| C | 0.035508  | -0.738602 | -1.267124 |

|   |           |           |           |
|---|-----------|-----------|-----------|
| C | 0.353713  | -2.842946 | -2.434413 |
| C | 0.163447  | -3.561008 | -1.228909 |
| C | -0.083044 | -2.833053 | -0.035670 |
| C | -0.166929 | -1.417353 | -0.074668 |
| C | -0.206231 | -3.539812 | 1.201461  |
| C | -0.377355 | -2.767065 | 2.429794  |
| C | -0.468321 | -1.435264 | 2.429841  |
| C | -0.475100 | -0.611273 | 1.174337  |
| C | 0.232353  | -4.978682 | -1.174303 |
| C | 0.083044  | -5.638014 | 0.017179  |
| C | -0.127000 | -4.913575 | 1.211574  |
| C | 0.206231  | 3.539812  | 1.201461  |
| C | 0.377355  | 2.767065  | 2.429794  |
| C | 0.468321  | 1.435264  | 2.429841  |
| C | 0.475100  | 0.611273  | 1.174337  |
| H | 1.495676  | 0.199292  | 1.071411  |
| H | 0.621291  | 0.909525  | 3.367965  |
| H | -0.428176 | -3.319717 | 3.365055  |
| H | -0.621291 | -0.909525 | 3.367965  |
| H | -1.495676 | -0.199292 | 1.071411  |
| H | 0.559223  | -3.393328 | -3.348720 |
| H | 0.410888  | -5.530147 | -2.093638 |
| H | 0.137860  | -6.721908 | 0.052286  |
| H | -0.218319 | -5.447625 | 2.153966  |
| H | 0.428176  | 3.319717  | 3.365055  |
| C | 0.127000  | 4.913575  | 1.211574  |
| C | -0.232353 | 4.978682  | -1.174303 |
| H | -0.559223 | 3.393328  | -3.348720 |
| C | -0.083044 | 5.638014  | 0.017179  |
| H | -0.410888 | 5.530147  | -2.093638 |

|   |           |           |           |
|---|-----------|-----------|-----------|
| H | -0.137860 | 6.721908  | 0.052286  |
| H | 0.218319  | 5.447625  | 2.153966  |
| H | 0.498363  | -0.946816 | -3.376081 |
| H | -0.498363 | 0.946816  | -3.376081 |

Fig2-des-Ph-11

|   |           |           |           |
|---|-----------|-----------|-----------|
| C | 5.654375  | -0.247744 | 0.502205  |
| C | 5.086772  | -1.396956 | 0.012602  |
| C | 3.711244  | -1.431744 | -0.342491 |
| C | 2.913459  | -0.276226 | -0.125905 |
| C | 3.539188  | 0.928971  | 0.315307  |
| C | 4.886588  | 0.926168  | 0.627684  |
| C | 2.750068  | 2.136611  | 0.314860  |
| C | 1.413058  | 2.140924  | 0.075512  |
| C | 0.684772  | 0.876559  | -0.084322 |
| C | 1.518276  | -0.299165 | -0.421618 |
| C | -0.684857 | 0.876645  | 0.084462  |
| C | -1.412913 | 2.141034  | -0.075442 |
| C | -0.667632 | 3.385207  | -0.059368 |
| C | 0.667783  | 3.385126  | 0.059932  |
| C | -1.518229 | -0.299248 | 0.421725  |
| C | -1.018797 | -1.396255 | 1.106913  |
| C | 1.018752  | -1.396011 | -1.107121 |
| C | 1.811943  | -2.526984 | -1.357055 |
| C | 3.122273  | -2.568298 | -0.944173 |
| C | -2.913511 | -0.276199 | 0.126055  |
| C | -3.538922 | 0.928995  | -0.315393 |
| C | -2.749896 | 2.136605  | -0.315018 |
| C | -3.711434 | -1.431622 | 0.342496  |
| C | -5.086838 | -1.396763 | -0.012759 |

|   |           |           |           |
|---|-----------|-----------|-----------|
| C | -5.654222 | -0.247468 | -0.502611 |
| C | -4.886322 | 0.926270  | -0.628139 |
| C | -3.122573 | -2.568201 | 0.944355  |
| C | -1.812318 | -2.526970 | 1.357278  |
| H | -0.016556 | -1.400232 | -1.428686 |
| H | 1.374062  | -3.376693 | -1.871969 |
| H | -3.730107 | -3.453688 | 1.111297  |
| H | -1.374610 | -3.376602 | 1.872468  |
| H | -3.258819 | 3.077925  | -0.510869 |
| H | -5.360152 | 1.848651  | -0.953766 |
| H | -6.707865 | -0.228017 | -0.764280 |
| H | -5.686587 | -2.291705 | 0.129909  |
| H | 3.729530  | -3.454083 | -1.110529 |
| H | 1.227132  | 4.314592  | 0.123066  |
| H | -1.226898 | 4.314736  | -0.122110 |
| H | 3.258965  | 3.077984  | 0.510503  |
| H | 5.360654  | 1.848630  | 0.952737  |
| H | 6.708019  | -0.228394 | 0.763861  |
| H | 5.686306  | -2.292036 | -0.130138 |
| H | 0.016401  | -1.400648 | 1.428672  |

Fig2-des-Ph-11-conTS

|   |           |           |           |
|---|-----------|-----------|-----------|
| C | -0.177195 | 2.819037  | -2.184431 |
| C | -0.083618 | 1.427657  | -2.200981 |
| C | 0.053598  | 0.722265  | -0.977412 |
| C | 0.326236  | 1.437412  | 0.213481  |
| C | 0.138335  | 2.836330  | 0.236501  |
| C | -0.138335 | 3.538406  | -0.977236 |
| C | -0.073211 | 0.672203  | -3.433106 |
| C | 0.073211  | -0.672203 | -3.433106 |

|   |           |           |           |
|---|-----------|-----------|-----------|
| C | 0.083618  | -1.427657 | -2.200981 |
| C | -0.053598 | -0.722265 | -0.977412 |
| C | 0.177195  | -2.819037 | -2.184431 |
| C | 0.138335  | -3.538406 | -0.977236 |
| C | -0.138335 | -2.836330 | 0.236501  |
| C | -0.326236 | -1.437412 | 0.213481  |
| C | -0.221240 | -3.555967 | 1.472105  |
| C | -0.536100 | -2.825407 | 2.671306  |
| C | -0.845523 | -1.497875 | 2.631661  |
| C | -0.766121 | -0.747200 | 1.419668  |
| C | 0.330464  | -4.945995 | -0.922841 |
| C | 0.267731  | -5.618347 | 0.276492  |
| C | -0.003934 | -4.930373 | 1.471854  |
| C | 0.221240  | 3.555967  | 1.472105  |
| C | 0.536100  | 2.825407  | 2.671306  |
| C | 0.845523  | 1.497875  | 2.631661  |
| C | 0.766121  | 0.747200  | 1.419668  |
| H | 1.465659  | -0.074156 | 1.299760  |
| H | 1.175832  | 0.988579  | 3.532746  |
| H | -0.590167 | -3.374374 | 3.607894  |
| H | -1.175832 | -0.988579 | 3.532746  |
| H | -1.465659 | 0.074156  | 1.299760  |
| H | 0.296110  | -3.358920 | -3.121066 |
| H | 0.535172  | -5.482328 | -1.845467 |
| H | 0.426133  | -6.692301 | 0.303553  |
| H | -0.052090 | -5.476596 | 2.410176  |
| H | 0.590167  | 3.374374  | 3.607894  |
| C | 0.003934  | 4.930373  | 1.471854  |
| H | -0.138356 | 1.219217  | -4.369961 |
| H | 0.138356  | -1.219217 | -4.369961 |

|   |           |          |           |
|---|-----------|----------|-----------|
| C | -0.330464 | 4.945995 | -0.922841 |
| H | -0.296110 | 3.358920 | -3.121066 |
| C | -0.267731 | 5.618347 | 0.276492  |
| H | -0.535172 | 5.482328 | -1.845467 |
| H | -0.426133 | 6.692301 | 0.303553  |
| H | 0.052090  | 5.476596 | 2.410176  |

Fig2-des-Ph-11-disTS

|   |           |           |           |
|---|-----------|-----------|-----------|
| C | 5.051298  | -0.211445 | 1.574863  |
| C | 4.475941  | -1.426302 | 1.208768  |
| C | 3.316466  | -1.463412 | 0.432789  |
| C | 2.688312  | -0.240721 | 0.058803  |
| C | 3.284381  | 0.993877  | 0.434877  |
| C | 4.473654  | 0.984557  | 1.179175  |
| C | 2.645939  | 2.201019  | 0.028515  |
| C | 1.394474  | 2.195558  | -0.521128 |
| C | 0.713305  | 0.943354  | -0.803492 |
| C | 1.496052  | -0.249731 | -0.728765 |
| C | -0.713305 | 0.943354  | -0.803491 |
| C | -1.394473 | 2.195558  | -0.521127 |
| C | -0.670534 | 3.440915  | -0.714859 |
| C | 0.670535  | 3.440915  | -0.714860 |
| C | -1.496052 | -0.249730 | -0.728765 |
| C | -1.126876 | -1.469499 | -1.363473 |
| C | 1.126875  | -1.469500 | -1.363472 |
| C | 1.744545  | -2.699041 | -0.937362 |
| C | 2.751127  | -2.701951 | -0.033325 |
| C | -2.688312 | -0.240721 | 0.058803  |
| C | -3.284380 | 0.993878  | 0.434879  |
| C | -2.645938 | 2.201020  | 0.028517  |

|   |           |           |           |
|---|-----------|-----------|-----------|
| C | -3.316467 | -1.463411 | 0.432788  |
| C | -4.475942 | -1.426301 | 1.208767  |
| C | -5.051298 | -0.211444 | 1.574863  |
| C | -4.473653 | 0.984557  | 1.179177  |
| C | -2.751129 | -2.701950 | -0.033328 |
| C | -1.744546 | -2.699040 | -0.937365 |
| H | 0.900218  | -1.403230 | -2.414593 |
| H | 1.403670  | -3.629205 | -1.383471 |
| H | -3.208561 | -3.634338 | 0.287291  |
| H | -1.403673 | -3.629204 | -1.383475 |
| H | -3.131996 | 3.149450  | 0.246142  |
| H | -4.931164 | 1.931270  | 1.454177  |
| H | -5.962277 | -0.202791 | 2.165715  |
| H | -4.940480 | -2.361300 | 1.510912  |
| H | 3.208559  | -3.634339 | 0.287295  |
| H | 1.237072  | 4.367055  | -0.758494 |
| H | -1.237070 | 4.367055  | -0.758492 |
| H | 3.131998  | 3.149449  | 0.246139  |
| H | 4.931165  | 1.931269  | 1.454174  |
| H | 5.962278  | -0.202792 | 2.165714  |
| H | 4.940479  | -2.361301 | 1.510914  |
| H | -0.900219 | -1.403228 | -2.414594 |

Fig2-des-Ph-12

|   |           |          |           |
|---|-----------|----------|-----------|
| C | 0.101952  | 2.814279 | 2.206296  |
| C | 0.069027  | 1.431370 | 2.207880  |
| C | -0.003093 | 0.728404 | 0.968610  |
| C | -0.130001 | 1.426704 | -0.226057 |
| C | -0.065338 | 2.836235 | -0.226452 |
| C | 0.063883  | 3.541935 | 1.004272  |



|   |           |           |           |
|---|-----------|-----------|-----------|
| C | 0.049737  | 0.671745  | 3.441808  |
| C | -0.049737 | -0.671745 | 3.441808  |
| C | -0.069027 | -1.431370 | 2.207880  |
| C | 0.003093  | -0.728404 | 0.968610  |
| C | -0.101952 | -2.814279 | 2.206296  |
| C | -0.063883 | -3.541935 | 1.004272  |
| C | 0.065338  | -2.836235 | -0.226452 |
| C | 0.130001  | -1.426704 | -0.226057 |
| C | 0.090881  | -3.570389 | -1.456340 |
| C | 0.162961  | -2.818926 | -2.706664 |
| C | 0.284411  | -1.489686 | -2.736793 |
| C | 0.419594  | -0.648427 | -1.497680 |
| C | -0.130001 | -4.965038 | 0.979057  |
| C | -0.088949 | -5.643819 | -0.206966 |
| C | 0.013662  | -4.941665 | -1.432564 |
| C | -0.090881 | 3.570389  | -1.456340 |
| C | -0.162961 | 2.818926  | -2.706664 |
| C | -0.284411 | 1.489686  | -2.736793 |
| C | -0.419594 | 0.648427  | -1.497680 |
| H | -1.476647 | 0.325976  | -1.445015 |
| H | -0.363623 | 0.987496  | -3.696071 |
| H | 0.117300  | -3.385188 | -3.633972 |
| H | 0.363623  | -0.987496 | -3.696071 |
| H | 1.476647  | -0.325976 | -1.445015 |
| H | -0.151606 | -3.352313 | 3.150402  |
| H | -0.217352 | -5.499937 | 1.920992  |
| H | -0.143103 | -6.728269 | -0.217324 |
| H | 0.025119  | -5.495422 | -2.367862 |
| H | -0.117300 | 3.385188  | -3.633972 |
| C | -0.013662 | 4.941665  | -1.432564 |

|   |           |           |           |
|---|-----------|-----------|-----------|
| H | 0.089555  | 1.221705  | 4.378410  |
| H | -0.089555 | -1.221705 | 4.378410  |
| C | 0.130001  | 4.965038  | 0.979057  |
| H | 0.151606  | 3.352313  | 3.150402  |
| C | 0.088949  | 5.643819  | -0.206966 |
| H | 0.217352  | 5.499937  | 1.920992  |
| H | 0.143103  | 6.728269  | -0.217324 |
| H | -0.025119 | 5.495422  | -2.367862 |

Fig2-des-Ph-12-synprod

|   |           |           |           |
|---|-----------|-----------|-----------|
| C | 5.561433  | -0.351845 | 0.443439  |
| C | 4.782731  | -1.527316 | 0.574988  |
| C | 3.428958  | -1.506453 | 0.332654  |
| C | 2.813175  | -0.275124 | -0.067294 |
| C | 3.564515  | 0.929917  | -0.055538 |
| C | 4.969155  | 0.850448  | 0.160365  |
| C | 2.877617  | 2.152211  | -0.198129 |
| C | 1.496081  | 2.187923  | -0.266060 |
| C | 0.758250  | 0.966021  | -0.363406 |
| C | 1.433535  | -0.242421 | -0.358652 |
| C | -0.697655 | 0.992624  | -0.278346 |
| C | -1.357751 | 2.228956  | -0.014872 |
| C | -0.577981 | 3.451537  | -0.031422 |
| C | 0.761337  | 3.434335  | -0.176461 |
| C | -1.425528 | -0.186473 | -0.347075 |
| C | -0.774672 | -1.422234 | -0.929185 |
| C | 0.756046  | -1.559908 | -0.658436 |
| C | 1.255786  | -2.632058 | 0.284722  |
| C | 2.542843  | -2.631908 | 0.648674  |
| C | -2.798641 | -0.188335 | -0.026295 |

|   |           |           |           |
|---|-----------|-----------|-----------|
| C | -3.455568 | 1.037858  | 0.282542  |
| C | -2.717167 | 2.234102  | 0.243150  |
| C | -3.539149 | -1.414971 | 0.016148  |
| C | -4.872895 | -1.391071 | 0.347133  |
| C | -5.529599 | -0.170409 | 0.634656  |
| C | -4.842893 | 1.012148  | 0.602885  |
| C | -2.834970 | -2.661032 | -0.278103 |
| C | -1.564618 | -2.678305 | -0.689569 |
| H | 1.169904  | -1.862457 | -1.633700 |
| H | 0.593922  | -3.439635 | 0.580935  |
| H | -3.389774 | -3.589621 | -0.167189 |
| H | -1.088872 | -3.623069 | -0.940785 |
| H | -3.224294 | 3.176724  | 0.436931  |
| H | -5.344572 | 1.949907  | 0.826506  |
| H | -6.586038 | -0.180656 | 0.885581  |
| H | -5.431637 | -2.322564 | 0.388500  |
| H | 2.952012  | -3.440820 | 1.248770  |
| H | 1.328373  | 4.361564  | -0.171109 |
| H | -1.106854 | 4.393255  | 0.090040  |
| H | 3.439475  | 3.083242  | -0.170884 |
| H | 5.559078  | 1.762451  | 0.123364  |
| H | 6.631875  | -0.401684 | 0.619141  |
| H | 5.256266  | -2.448253 | 0.905622  |
| H | -0.833125 | -1.247682 | -2.016813 |

Fig3a-13

|   |           |           |           |
|---|-----------|-----------|-----------|
| C | 2.882112  | -0.319210 | 0.000009  |
| C | 1.548272  | -0.404650 | 0.000003  |
| C | 0.673080  | 0.761493  | 0.000000  |
| C | -0.673080 | 0.761493  | -0.000002 |

|   |           |           |           |
|---|-----------|-----------|-----------|
| C | -1.548272 | -0.404650 | -0.000003 |
| C | -2.882112 | -0.319210 | -0.000008 |
| H | 3.389262  | 0.642983  | 0.000014  |
| H | 3.510318  | -1.204189 | 0.000011  |
| H | -3.389262 | 0.642983  | -0.000012 |
| H | -3.510318 | -1.204189 | -0.000009 |
| H | 1.086652  | -1.389619 | -0.000002 |
| H | 1.180921  | 1.725021  | 0.000001  |
| H | -1.180921 | 1.725021  | -0.000003 |
| H | -1.086652 | -1.389619 | 0.000001  |

Fig3a-TS-1a

|   |           |           |           |
|---|-----------|-----------|-----------|
| C | -1.061857 | 1.136709  | 0.480883  |
| C | -1.477970 | -0.071765 | -0.145390 |
| C | -0.690435 | -1.217663 | -0.187543 |
| C | 0.690435  | -1.217663 | 0.187543  |
| C | 1.477970  | -0.071765 | 0.145390  |
| C | 1.061857  | 1.136709  | -0.480883 |
| H | -0.512595 | 1.099169  | 1.415543  |
| H | -1.612260 | 2.054056  | 0.291288  |
| H | 0.512595  | 1.099169  | -1.415543 |
| H | 1.612260  | 2.054056  | -0.291288 |
| H | -2.438761 | -0.084626 | -0.658055 |
| H | -1.140199 | -2.152289 | -0.515664 |
| H | 1.140199  | -2.152289 | 0.515664  |
| H | 2.438761  | -0.084625 | 0.658055  |

Fig3a-TS-1b

|   |           |           |           |
|---|-----------|-----------|-----------|
| C | -1.137664 | -1.200283 | 0.061503  |
| C | -1.473455 | 0.124777  | -0.193362 |

|   |           |           |           |
|---|-----------|-----------|-----------|
| C | -0.698428 | 1.233148  | 0.162581  |
| C | 0.700455  | 1.232333  | 0.161508  |
| C | 1.473775  | 0.122608  | -0.193684 |
| C | 1.135616  | -1.201648 | 0.062474  |
| H | -1.632289 | -1.978723 | -0.518503 |
| H | -0.931371 | -1.491002 | 1.078524  |
| H | 0.928082  | -1.490417 | 1.079816  |
| H | 1.629657  | -1.981638 | -0.515930 |
| H | -2.311835 | 0.327822  | -0.861036 |
| H | -1.170471 | 2.213063  | 0.117189  |
| H | 1.173637  | 2.211637  | 0.114951  |
| H | 2.312797  | 0.323654  | -0.861135 |

Fig3a-14

|   |           |           |           |
|---|-----------|-----------|-----------|
| C | -1.190663 | -0.725139 | 0.249175  |
| C | 0.112021  | -1.420130 | -0.063295 |
| C | 1.255481  | -0.725911 | -0.108276 |
| C | 1.255468  | 0.725976  | 0.108254  |
| C | 0.111956  | 1.420121  | 0.063299  |
| C | -1.190699 | 0.725085  | -0.249181 |
| H | -1.339337 | -0.740009 | 1.340830  |
| H | -2.036110 | -1.269656 | -0.184268 |
| H | -1.339394 | 0.739998  | -1.340834 |
| H | -2.036175 | 1.269540  | 0.184283  |
| H | 0.111545  | -2.499515 | -0.191447 |
| H | 2.203394  | -1.226189 | -0.287706 |
| H | 2.203324  | 1.226328  | 0.287752  |
| H | 0.111366  | 2.499498  | 0.191526  |

Fig3b-15

|   |           |           |           |
|---|-----------|-----------|-----------|
| C | 0.670009  | 1.917537  | -0.019032 |
| C | -0.669949 | 1.917639  | 0.019214  |
| H | -1.161124 | 2.889891  | -0.000931 |
| H | 1.161270  | 2.889782  | 0.000353  |
| C | 1.590636  | 0.763372  | -0.098917 |
| C | 2.792621  | 0.793233  | 0.617191  |
| C | 1.325491  | -0.345961 | -0.911833 |
| C | 3.689964  | -0.267709 | 0.552245  |
| H | 3.020168  | 1.656182  | 1.238316  |
| C | 2.223656  | -1.403815 | -0.981621 |
| H | 0.409490  | -0.373008 | -1.493313 |
| C | 3.406538  | -1.371973 | -0.246049 |
| H | 4.613403  | -0.229341 | 1.122714  |
| H | 2.001585  | -2.255143 | -1.618418 |
| H | 4.107288  | -2.199688 | -0.302496 |
| C | -1.590629 | 0.763462  | 0.099037  |
| C | -1.325817 | -0.345596 | 0.912360  |
| C | -2.792300 | 0.793134  | -0.617669 |
| C | -2.224028 | -1.403455 | 0.982062  |
| H | -0.410019 | -0.372451 | 1.494171  |
| C | -3.689654 | -0.267781 | -0.552800 |
| H | -3.019511 | 1.655896  | -1.239165 |
| C | -3.406560 | -1.371814 | 0.245967  |
| H | -2.002235 | -2.254599 | 1.619198  |
| H | -4.612843 | -0.229640 | -1.123690 |
| H | -4.107335 | -2.199516 | 0.302345  |

Fig3b-TS-2a

|   |           |          |           |
|---|-----------|----------|-----------|
| C | 0.674937  | 2.155073 | -0.077996 |
| C | -0.674963 | 2.155070 | 0.077914  |

|   |           |           |           |
|---|-----------|-----------|-----------|
| H | -1.218733 | 3.097101  | 0.089863  |
| H | 1.218683  | 3.097118  | -0.089899 |
| C | 1.435023  | 0.922637  | -0.202732 |
| C | 2.755555  | 0.834661  | 0.208152  |
| C | 0.700866  | -0.294337 | -0.599625 |
| C | 3.426410  | -0.392531 | 0.261907  |
| H | 3.267650  | 1.740316  | 0.525767  |
| C | 1.463546  | -1.530069 | -0.579472 |
| C | 2.757853  | -1.573660 | -0.125217 |
| H | 4.457374  | -0.434512 | 0.597886  |
| H | 0.975164  | -2.436242 | -0.927392 |
| H | 3.289606  | -2.520896 | -0.099945 |
| C | -1.435027 | 0.922626  | 0.202722  |
| C | -0.700834 | -0.294347 | 0.599562  |
| C | -2.755592 | 0.834645  | -0.208057 |
| C | -1.463496 | -1.530090 | 0.579393  |
| H | -0.081167 | -0.176080 | 1.491796  |
| C | -3.426445 | -0.392550 | -0.261789 |
| H | -3.267711 | 1.740302  | -0.525626 |
| C | -2.757836 | -1.573682 | 0.125233  |
| H | -0.975075 | -2.436272 | 0.927243  |
| H | -4.457408 | -0.434540 | -0.597768 |
| H | -3.289576 | -2.520925 | 0.099974  |
| H | 0.081207  | -0.176051 | -1.491863 |

Fig3b-TS-2b

|   |           |          |           |
|---|-----------|----------|-----------|
| C | 0.798291  | 2.059716 | 0.365757  |
| C | -0.587415 | 2.133545 | 0.180663  |
| H | -0.982690 | 3.065170 | -0.219612 |
| H | 1.369610  | 2.958574 | 0.140560  |

|   |           |           |           |
|---|-----------|-----------|-----------|
| C | 1.494658  | 0.846027  | 0.375374  |
| C | 2.713990  | 0.769386  | -0.370125 |
| C | 0.894866  | -0.397620 | 0.868991  |
| C | 3.187093  | -0.419197 | -0.837360 |
| H | 3.202103  | 1.700637  | -0.648133 |
| C | 1.406824  | -1.630485 | 0.270990  |
| C | 2.481613  | -1.633152 | -0.553331 |
| H | 4.076090  | -0.448166 | -1.459676 |
| H | 0.926975  | -2.566126 | 0.544504  |
| H | 2.847075  | -2.568161 | -0.968778 |
| C | -1.392760 | 0.997514  | 0.154794  |
| C | -0.994518 | -0.160820 | 0.945825  |
| C | -2.489307 | 0.884966  | -0.753868 |
| C | -1.723148 | -1.402213 | 0.698964  |
| H | -0.947176 | 0.094291  | 2.000441  |
| C | -3.101427 | -0.311960 | -0.971893 |
| H | -2.786321 | 1.766769  | -1.316470 |
| C | -2.693663 | -1.477983 | -0.242358 |
| H | -1.472318 | -2.272841 | 1.299849  |
| H | -3.901632 | -0.393201 | -1.701074 |
| H | -3.209447 | -2.417646 | -0.419734 |
| H | 0.907150  | -0.465648 | 1.953579  |

Fig3b-16

|   |           |           |          |
|---|-----------|-----------|----------|
| C | -0.003130 | 0.720627  | 2.065670 |
| C | 0.003130  | -0.720627 | 2.065670 |
| H | -0.053794 | -1.246101 | 3.016183 |
| H | 0.053794  | 1.246101  | 3.016183 |
| C | -0.106345 | 1.427558  | 0.916119 |
| C | -0.116180 | 2.877067  | 0.901965 |



|   |           |           |           |
|---|-----------|-----------|-----------|
| C | -0.324954 | 0.696668  | -0.400788 |
| C | 0.003130  | 3.566622  | -0.249977 |
| H | -0.170251 | 3.395364  | 1.856450  |
| C | 0.090467  | 1.532947  | -1.587681 |
| C | 0.192213  | 2.866230  | -1.513969 |
| H | 0.020948  | 4.652351  | -0.242648 |
| H | 0.259566  | 1.031459  | -2.536320 |
| H | 0.446073  | 3.446676  | -2.396581 |
| C | 0.106345  | -1.427558 | 0.916119  |
| C | 0.324954  | -0.696668 | -0.400788 |
| C | 0.116180  | -2.877067 | 0.901965  |
| C | -0.090467 | -1.532947 | -1.587681 |
| H | 1.421755  | -0.538349 | -0.485108 |
| C | -0.003130 | -3.566622 | -0.249977 |
| H | 0.170251  | -3.395364 | 1.856450  |
| C | -0.192213 | -2.866230 | -1.513969 |
| H | -0.259566 | -1.031459 | -2.536320 |
| H | -0.020948 | -4.652351 | -0.242648 |
| H | -0.446073 | -3.446676 | -2.396581 |
| H | -1.421755 | 0.538349  | -0.485108 |

Fig3b-17

|   |           |           |           |
|---|-----------|-----------|-----------|
| C | 0.899872  | 2.002708  | 0.117873  |
| C | -0.508361 | 2.063553  | -0.213863 |
| H | -0.884816 | 2.960942  | -0.698925 |
| H | 1.504434  | 2.896744  | -0.019667 |
| C | 1.512434  | 0.825705  | 0.380139  |
| C | 2.952732  | 0.634520  | 0.247224  |
| C | 0.726993  | -0.447828 | 0.584389  |
| C | 3.407133  | -0.514748 | -0.296123 |

|   |           |           |           |
|---|-----------|-----------|-----------|
| H | 3.626038  | 1.459649  | 0.466364  |
| C | 1.171393  | -1.479959 | -0.429664 |
| C | 2.467161  | -1.527243 | -0.774462 |
| H | 4.468687  | -0.654870 | -0.477950 |
| H | 0.458178  | -2.212203 | -0.796575 |
| H | 2.836182  | -2.304525 | -1.437801 |
| C | -1.316438 | 0.991476  | -0.047303 |
| C | -0.793581 | -0.171269 | 0.774019  |
| C | -2.664799 | 0.927448  | -0.566579 |
| C | -1.632107 | -1.414031 | 0.678783  |
| H | -0.866255 | 0.177277  | 1.819412  |
| C | -3.390901 | -0.207443 | -0.500312 |
| H | -3.062126 | 1.811580  | -1.059589 |
| C | -2.842626 | -1.414894 | 0.104662  |
| H | -1.235834 | -2.317137 | 1.138228  |
| H | -4.389063 | -0.244603 | -0.926268 |
| H | -3.439490 | -2.322462 | 0.083560  |
| H | 1.050637  | -0.858359 | 1.556505  |

Fig5-TS-3a

|   |          |           |           |
|---|----------|-----------|-----------|
| C | 2.328727 | -1.702195 | 0.351332  |
| C | 3.286400 | -0.854631 | -0.222505 |
| C | 3.166733 | 0.510311  | -0.423628 |
| C | 1.056861 | -1.402511 | 0.798074  |
| C | 2.076736 | 1.361531  | -0.215180 |
| C | 0.313445 | -0.207665 | 0.679205  |
| C | 0.774537 | 1.084392  | 0.214154  |
| H | 2.649853 | -2.729403 | 0.514135  |
| H | 4.238312 | -1.305817 | -0.487727 |
| H | 4.050854 | 1.001835  | -0.825401 |

|   |           |           |           |
|---|-----------|-----------|-----------|
| H | 0.522583  | -2.207293 | 1.295119  |
| H | 2.250683  | 2.401412  | -0.483829 |
| H | -0.565784 | -0.168321 | 1.313029  |
| C | -0.193499 | 2.154406  | 0.246846  |
| C | -1.538064 | 1.925698  | 0.117592  |
| H | 0.180385  | 3.168996  | 0.359628  |
| C | -2.056942 | 0.658453  | -0.268019 |
| C | -3.148842 | 0.001891  | 0.337808  |
| C | -1.283029 | -0.347414 | -0.962175 |
| C | -3.057083 | -1.368153 | 0.048693  |
| C | -1.939611 | -1.576650 | -0.777187 |
| H | -3.745410 | -2.132658 | 0.389981  |
| H | -1.659176 | -2.517122 | -1.237496 |
| H | -2.230363 | 2.738906  | 0.334391  |
| H | -3.867753 | 0.467186  | 1.003373  |
| H | -0.542397 | -0.142498 | -1.725274 |

Fig5-TS-3b

|   |           |           |           |
|---|-----------|-----------|-----------|
| C | -2.206304 | -1.790350 | -0.050925 |
| C | -3.101831 | -0.936733 | -0.721102 |
| C | -3.106396 | 0.442082  | -0.744854 |
| C | -1.166529 | -1.439232 | 0.782698  |
| C | -2.137299 | 1.332400  | -0.248127 |
| C | -0.590122 | -0.179575 | 1.037989  |
| C | -0.932867 | 1.085331  | 0.392044  |
| H | -2.426866 | -2.852783 | -0.115744 |
| H | -3.916759 | -1.427211 | -1.248391 |
| H | -3.933634 | 0.909277  | -1.273275 |
| H | -0.710040 | -2.256314 | 1.336977  |
| H | -2.321741 | 2.381659  | -0.476728 |

|   |           |           |           |
|---|-----------|-----------|-----------|
| C | 0.036105  | 2.139150  | 0.416230  |
| C | 1.375406  | 1.909117  | 0.211561  |
| H | -0.328491 | 3.156604  | 0.294770  |
| C | 2.019625  | 0.650212  | 0.090358  |
| C | 2.854136  | 0.316350  | -0.983242 |
| C | 1.721535  | -0.598003 | 0.809951  |
| C | 3.030242  | -1.081134 | -0.986825 |
| C | 2.373512  | -1.634808 | 0.113992  |
| H | 3.596592  | -1.634609 | -1.728705 |
| H | 2.442297  | -2.665051 | 0.443256  |
| H | 1.958086  | 2.776447  | -0.099713 |
| H | 3.166883  | 0.998683  | -1.765826 |
| H | -0.177089 | -0.043712 | 2.026170  |
| H | 1.635487  | -0.631840 | 1.888714  |

Fig6-TS-4

|   |           |           |           |
|---|-----------|-----------|-----------|
| C | 3.589482  | 1.385436  | 0.206534  |
| C | 4.130640  | 0.167677  | 0.411633  |
| C | 3.463443  | -1.118708 | 0.380214  |
| C | 2.207341  | 1.705822  | -0.091375 |
| C | 2.188666  | -1.424290 | 0.068466  |
| C | 1.155811  | 0.893327  | -0.316048 |
| C | 1.069249  | -0.571126 | -0.342966 |
| H | 4.254332  | 2.242443  | 0.285807  |
| H | 5.193122  | 0.130084  | 0.640814  |
| H | 4.098899  | -1.962214 | 0.641740  |
| H | 1.994709  | 2.771796  | -0.140814 |
| H | 1.931375  | -2.481676 | 0.114441  |
| H | 0.206731  | 1.388492  | -0.509202 |
| C | -0.085559 | -1.170522 | -0.717601 |

|   |           |           |           |
|---|-----------|-----------|-----------|
| C | -1.306195 | -0.475442 | -1.177257 |
| H | -0.134967 | -2.259183 | -0.708889 |
| C | -2.361260 | -0.179139 | -0.399352 |
| C | -3.605427 | 0.479217  | -0.831751 |
| C | -2.507856 | -0.428793 | 1.042868  |
| C | -4.404143 | 0.603281  | 0.247789  |
| C | -3.716795 | 0.036885  | 1.419898  |
| H | -5.393753 | 1.044620  | 0.270259  |
| H | -4.132547 | 0.010804  | 2.420520  |
| H | -1.358632 | -0.203356 | -2.234177 |
| H | -3.811221 | 0.792169  | -1.847911 |
| H | -1.752422 | -0.895735 | 1.661093  |

Fig6-TS-5a

|   |           |           |           |
|---|-----------|-----------|-----------|
| C | 1.871703  | -1.830231 | -0.381773 |
| C | 3.042540  | -1.110820 | 0.077755  |
| C | 3.163993  | 0.211844  | 0.328935  |
| C | 0.654583  | -1.361447 | -0.720049 |
| C | 2.162343  | 1.248981  | 0.247408  |
| C | 0.144367  | 0.010454  | -0.695301 |
| C | 0.878437  | 1.180013  | -0.183763 |
| H | 2.018318  | -2.900224 | -0.513786 |
| H | 3.931123  | -1.721040 | 0.219558  |
| H | 4.141970  | 0.554537  | 0.659935  |
| H | -0.071603 | -2.076256 | -1.098975 |
| H | 2.491704  | 2.228819  | 0.588468  |
| H | -0.407379 | 0.242177  | -1.601899 |
| C | -0.027504 | 2.333804  | -0.112848 |
| C | -1.332942 | 2.046176  | 0.008114  |
| H | 0.361356  | 3.347441  | -0.094397 |

|   |           |           |           |
|---|-----------|-----------|-----------|
| C | -1.748778 | 0.639844  | 0.098072  |
| C | -2.848846 | 0.024255  | -0.542284 |
| C | -1.209375 | -0.346984 | 1.042636  |
| C | -2.953930 | -1.275793 | -0.054860 |
| C | -1.960894 | -1.505810 | 0.926221  |
| H | -3.686340 | -2.006035 | -0.382842 |
| H | -1.808896 | -2.420719 | 1.483546  |
| H | -2.089511 | 2.824814  | 0.053104  |
| H | -3.464101 | 0.480776  | -1.307650 |
| H | -0.430814 | -0.140009 | 1.765365  |

Fig6-TS-5b

|   |           |           |           |
|---|-----------|-----------|-----------|
| C | -1.694776 | -1.936591 | 0.193562  |
| C | -2.960266 | -1.337822 | 0.325089  |
| C | -3.325387 | -0.022506 | 0.097398  |
| C | -0.574915 | -1.395661 | -0.411321 |
| C | -2.486251 | 1.080774  | -0.137602 |
| C | -0.375936 | -0.078418 | -0.839603 |
| C | -1.118435 | 1.086039  | -0.350442 |
| H | -1.632795 | -2.986034 | 0.470062  |
| H | -3.760888 | -2.000817 | 0.645839  |
| H | -4.376786 | 0.213012  | 0.243019  |
| H | 0.254510  | -2.069860 | -0.631240 |
| H | -2.954756 | 2.059689  | -0.035572 |
| H | 0.187705  | 0.063039  | -1.747696 |
| C | -0.321105 | 2.196784  | 0.048502  |
| C | 0.934304  | 1.906404  | 0.522949  |
| H | -0.804661 | 3.138965  | 0.294816  |
| C | 1.626412  | 0.680564  | 0.254840  |
| C | 2.154658  | -0.199961 | 1.273738  |

|   |          |           |           |
|---|----------|-----------|-----------|
| C | 2.267295 | 0.270754  | -0.993810 |
| C | 2.941736 | -1.138173 | 0.663114  |
| C | 3.038132 | -0.827162 | -0.746527 |
| H | 3.422237 | -1.980137 | 1.149140  |
| H | 3.641814 | -1.362459 | -1.469528 |
| H | 1.337550 | 2.567813  | 1.291024  |
| H | 1.881216 | -0.161190 | 2.321301  |
| H | 2.172068 | 0.807835  | -1.930489 |

Fig6-TS-6a

|   |           |           |           |
|---|-----------|-----------|-----------|
| C | -2.080495 | -1.455199 | 0.558642  |
| C | -2.775159 | -0.768443 | -0.381806 |
| C | -2.654821 | 0.631147  | -0.695179 |
| C | -1.066355 | -0.949617 | 1.444484  |
| C | -1.629563 | 1.468314  | -0.415205 |
| C | -0.339659 | 0.185520  | 1.316267  |
| C | -0.361694 | 1.158673  | 0.231496  |
| H | -2.357269 | -2.496122 | 0.711289  |
| H | -3.555596 | -1.305262 | -0.915737 |
| H | -3.480152 | 1.053018  | -1.265168 |
| H | -0.844339 | -1.570496 | 2.308481  |
| H | -1.711449 | 2.490584  | -0.783242 |
| H | 0.409464  | 0.379805  | 2.077637  |
| C | 0.664475  | 2.186988  | 0.234065  |
| C | 1.944462  | 1.713145  | 0.198114  |
| H | 0.393012  | 3.240942  | 0.227257  |
| C | 2.001301  | 0.351294  | -0.220906 |
| C | 2.639236  | -0.778747 | 0.290876  |
| C | 0.965069  | -0.117614 | -1.172168 |
| C | 1.985800  | -1.904273 | -0.245631 |

|   |          |           |           |
|---|----------|-----------|-----------|
| C | 0.997031 | -1.506372 | -1.166854 |
| H | 2.222462 | -2.932727 | 0.009338  |
| H | 0.412375 | -2.165552 | -1.795394 |
| H | 2.821307 | 2.302415  | 0.454899  |
| H | 3.381546 | -0.789879 | 1.079740  |
| H | 0.570876 | 0.504376  | -1.966262 |

Fig6-18

|   |           |           |           |
|---|-----------|-----------|-----------|
| C | -3.169710 | 0.679741  | -0.041510 |
| C | -3.169641 | -0.679822 | -0.041521 |
| C | -2.116924 | -1.516935 | -0.570292 |
| C | -2.117070 | 1.516978  | -0.570219 |
| C | -0.807420 | -1.201222 | -0.609220 |
| C | -0.807527 | 1.201385  | -0.609129 |
| C | -0.252000 | 0.000019  | 0.108045  |
| H | -4.088050 | 1.181553  | 0.257303  |
| H | -4.087942 | -1.181724 | 0.257258  |
| H | -2.430389 | -2.462528 | -1.009356 |
| H | -2.430641 | 2.462523  | -1.009314 |
| H | -0.117894 | -1.835601 | -1.159972 |
| H | -0.118063 | 1.835774  | -1.159938 |
| C | -0.405470 | -0.000102 | 1.625736  |
| H | -1.292180 | -0.000157 | 2.248603  |
| C | 0.903887  | -0.000108 | 1.862413  |
| H | 1.518379  | -0.000164 | 2.756715  |
| C | 1.320917  | -0.000015 | 0.395045  |
| C | 2.145324  | 1.174310  | -0.059870 |
| C | 2.145294  | -1.174287 | -0.060055 |
| H | 1.863236  | 2.204524  | 0.122007  |
| C | 3.265270  | 0.735997  | -0.655999 |



|   |          |           |           |
|---|----------|-----------|-----------|
| H | 1.863177 | -2.204524 | 0.121656  |
| C | 3.265249 | -0.735907 | -0.656120 |
| H | 4.059664 | 1.350834  | -1.064280 |
| H | 4.059627 | -1.350701 | -1.064498 |

Fig6-19

|   |           |           |           |
|---|-----------|-----------|-----------|
| C | 3.109766  | -1.186568 | 0.270676  |
| C | 3.301522  | 0.147934  | 0.408360  |
| C | 2.395043  | 1.202087  | 0.012258  |
| C | 1.965896  | -1.831973 | -0.345839 |
| C | 1.054401  | 1.094242  | -0.088704 |
| C | 0.709167  | -1.362033 | -0.401151 |
| C | 0.242720  | -0.124891 | 0.324284  |
| H | 3.934905  | -1.839805 | 0.547764  |
| H | 4.269584  | 0.474462  | 0.784014  |
| H | 2.843318  | 2.171453  | -0.200164 |
| H | 2.166049  | -2.790850 | -0.821518 |
| H | -0.033843 | -1.926903 | -0.957136 |
| C | 0.124149  | 2.151253  | -0.459526 |
| H | 0.440665  | 3.142534  | -0.767370 |
| C | -1.143468 | 1.743500  | -0.335119 |
| H | -2.031517 | 2.334492  | -0.532119 |
| C | -1.251981 | 0.282068  | 0.064645  |
| C | -2.168645 | 0.077229  | 1.249419  |
| C | -1.998118 | -0.450197 | -1.032273 |
| H | -1.940254 | 0.465075  | 2.235572  |
| C | -3.254289 | -0.618414 | 0.879559  |
| H | -1.646673 | -0.489032 | -2.056755 |
| C | -3.152512 | -0.937941 | -0.552331 |
| H | -4.083114 | -0.905308 | 1.516849  |

|   |           |           |           |
|---|-----------|-----------|-----------|
| H | -3.907268 | -1.472768 | -1.118167 |
| H | 0.386242  | -0.281126 | 1.403490  |

Fig6-20

|   |           |           |           |
|---|-----------|-----------|-----------|
| C | -0.754995 | -0.121268 | -0.702232 |
| C | -2.136080 | 0.217339  | -0.208368 |
| C | -2.836497 | -0.912568 | 0.014787  |
| H | -3.842840 | -0.994699 | 0.409461  |
| C | -0.721755 | -1.617319 | -0.619035 |
| H | 0.113388  | -2.230299 | -0.929799 |
| C | -1.952017 | -2.049749 | -0.270610 |
| H | -2.260881 | -3.088052 | -0.204842 |
| C | -2.148019 | 1.623354  | 0.163317  |
| H | -3.032717 | 2.219293  | 0.357704  |
| C | -0.878918 | 2.042360  | 0.279832  |
| C | 2.718768  | -0.671041 | -0.590866 |
| C | 2.324373  | -1.215972 | 0.584820  |
| C | 1.514456  | -0.570730 | 1.594763  |
| C | 2.414210  | 0.668607  | -1.045285 |
| C | 0.612693  | 0.410076  | 1.409956  |
| C | 1.345256  | 1.411823  | -0.708426 |
| C | 0.141309  | 0.923331  | 0.062244  |
| H | 3.417684  | -1.239801 | -1.200895 |
| H | 2.727601  | -2.192249 | 0.846618  |
| H | 1.670417  | -0.916604 | 2.615109  |
| H | 3.152516  | 1.122179  | -1.704674 |
| H | 0.141401  | 0.850182  | 2.285861  |
| H | 1.309393  | 2.444950  | -1.051851 |
| H | -0.687125 | 0.149886  | -1.768104 |
| H | -0.565533 | 3.045763  | 0.556032  |

Fig8-21

|   |           |           |           |
|---|-----------|-----------|-----------|
| C | 1.145137  | -0.399744 | -0.084078 |
| C | 1.971959  | 0.712461  | 0.096047  |
| C | 1.426303  | 1.994819  | 0.121368  |
| C | 0.056094  | 2.126131  | -0.030544 |
| C | -0.800376 | 1.018370  | -0.176869 |
| C | -0.243899 | -0.287439 | -0.210405 |
| C | 2.001512  | -1.641954 | -0.089062 |
| C | 3.389197  | -1.090212 | 0.113933  |
| C | 3.357267  | 0.247043  | 0.216303  |
| H | 2.055415  | 2.871278  | 0.248050  |
| H | -0.386972 | 3.118998  | -0.029437 |
| H | 4.210439  | 0.900069  | 0.363767  |
| H | 4.274181  | -1.713893 | 0.162571  |
| C | -2.229973 | 1.298030  | -0.368148 |
| C | -1.024855 | -1.506347 | -0.459286 |
| H | -0.510692 | -2.285688 | -1.019223 |
| H | -2.456092 | 2.243786  | -0.858317 |
| C | -2.278420 | -1.740377 | -0.056562 |
| C | -3.252035 | 0.527344  | 0.020527  |
| H | -2.759104 | -2.672998 | -0.343068 |
| C | -3.061564 | -0.761393 | 0.780295  |
| H | -4.267008 | 0.840604  | -0.212557 |
| H | 1.715390  | -2.343503 | 0.705705  |
| H | 1.924256  | -2.197017 | -1.034705 |
| H | -4.027214 | -1.185727 | 1.066550  |
| H | -2.510670 | -0.556310 | 1.709538  |

Fig9a-s-trans-22

|   |           |           |           |
|---|-----------|-----------|-----------|
| C | -1.851541 | 0.200775  | 0.000111  |
| C | -0.529988 | 0.490372  | 0.000448  |
| C | 0.530021  | -0.489413 | 0.000471  |
| H | -0.239036 | 1.538579  | 0.000702  |
| C | 1.851600  | -0.200811 | 0.000197  |
| C | 2.932336  | -1.196036 | 0.000212  |
| C | 2.506509  | 1.116580  | -0.000239 |
| C | 4.108654  | -0.535591 | -0.000114 |
| C | 3.840533  | 0.911492  | -0.000406 |
| H | 5.097663  | -0.977871 | -0.000154 |
| H | 4.606693  | 1.677852  | -0.000731 |
| H | 0.237980  | -1.537332 | 0.000733  |
| H | 2.773972  | -2.267209 | 0.000493  |
| H | 1.998382  | 2.071648  | -0.000440 |
| C | -2.506354 | -1.116722 | -0.000464 |
| C | -3.840408 | -0.911763 | -0.000197 |
| H | -1.998139 | -2.071782 | -0.000871 |
| C | -4.108845 | 0.535340  | -0.000127 |
| H | -4.606279 | -1.678427 | -0.000401 |
| C | -2.932421 | 1.195842  | 0.000170  |
| H | -5.098039 | 0.977140  | -0.000103 |
| H | -2.773778 | 2.267013  | 0.000404  |

Fig9a-s-cis-22

|   |           |           |           |
|---|-----------|-----------|-----------|
| C | -1.601933 | 0.554464  | -0.034384 |
| C | -0.697889 | 1.541403  | -0.209380 |
| C | 0.697888  | 1.541403  | 0.209381  |
| H | -1.048364 | 2.466894  | -0.667373 |
| C | 1.601933  | 0.554465  | 0.034384  |
| C | 1.454300  | -0.724341 | -0.681878 |

|   |           |           |           |
|---|-----------|-----------|-----------|
| C | 2.993459  | 0.599811  | 0.510596  |
| C | 2.637051  | -1.369823 | -0.614006 |
| C | 3.597852  | -0.546929 | 0.138483  |
| H | 2.866788  | -2.333191 | -1.053809 |
| H | 4.623170  | -0.831335 | 0.343471  |
| H | 1.048363  | 2.466894  | 0.667374  |
| H | 0.554028  | -1.048164 | -1.185337 |
| H | 3.417035  | 1.418288  | 1.079224  |
| C | -1.454299 | -0.724342 | 0.681876  |
| C | -2.637051 | -1.369824 | 0.614006  |
| H | -0.554026 | -1.048167 | 1.185332  |
| C | -3.597853 | -0.546929 | -0.138480 |
| H | -2.866788 | -2.333192 | 1.053808  |
| C | -2.993459 | 0.599811  | -0.510596 |
| H | -4.623171 | -0.831333 | -0.343467 |
| H | -3.417034 | 1.418288  | -1.079225 |

Fig9a-TS-7a

|   |           |           |           |
|---|-----------|-----------|-----------|
| C | -1.408733 | 0.737118  | 0.089880  |
| C | -0.697858 | 1.918656  | -0.058687 |
| C | 0.697999  | 1.918655  | 0.058792  |
| H | -1.230515 | 2.842036  | -0.274676 |
| C | 1.408832  | 0.737098  | -0.089760 |
| C | 0.836615  | -0.498702 | -0.737149 |
| C | 2.696731  | 0.392949  | 0.371144  |
| C | 1.785241  | -1.497380 | -0.599322 |
| C | 2.896165  | -0.955624 | 0.094225  |
| H | 1.721698  | -2.496204 | -1.009865 |
| H | 3.786749  | -1.515110 | 0.362432  |
| H | 1.230621  | 2.842128  | 0.274469  |

|   |           |           |           |
|---|-----------|-----------|-----------|
| H | 0.089924  | -0.452124 | -1.520350 |
| H | 3.354036  | 1.037992  | 0.939933  |
| C | -0.836816 | -0.498680 | 0.737461  |
| C | -1.785463 | -1.497282 | 0.599407  |
| H | -0.090242 | -0.452181 | 1.520775  |
| C | -2.896157 | -0.955470 | -0.094487 |
| H | -1.722116 | -2.496090 | 1.010020  |
| C | -2.696531 | 0.393050  | -0.371405 |
| H | -3.786702 | -1.514905 | -0.362930 |
| H | -3.353610 | 1.038129  | -0.940415 |

Fig9a-TS-7b

|   |           |           |           |
|---|-----------|-----------|-----------|
| C | -0.830720 | -1.286973 | -0.000080 |
| C | -2.173573 | -0.660550 | -0.000142 |
| C | -2.166575 | 0.681406  | 0.000207  |
| H | -3.093127 | -1.240255 | -0.000561 |
| C | -0.817225 | 1.293619  | 0.000523  |
| C | 0.031602  | 1.266449  | 1.115944  |
| C | 0.031027  | 1.267482  | -1.115362 |
| C | 1.412154  | 1.499602  | 0.675823  |
| C | 1.411758  | 1.500545  | -0.675951 |
| H | 2.262962  | 1.617086  | 1.334385  |
| H | 2.262243  | 1.618571  | -1.334831 |
| H | -3.080032 | 1.270652  | 0.000387  |
| H | -0.296309 | 1.273642  | 2.149267  |
| H | -0.297825 | 1.273581  | -2.148383 |
| C | 0.018237  | -1.267920 | 1.115469  |
| C | 1.396803  | -1.512384 | 0.675625  |
| H | -0.309759 | -1.270673 | 2.148777  |
| C | 1.396664  | -1.512528 | -0.676196 |

|   |           |           |           |
|---|-----------|-----------|-----------|
| H | 2.245857  | -1.641173 | 1.334336  |
| C | 0.018180  | -1.267500 | -1.115756 |
| H | 2.245945  | -1.639395 | -1.334988 |
| H | -0.309955 | -1.269513 | -2.149017 |

Fig9b-s-trans-23

|   |           |           |           |
|---|-----------|-----------|-----------|
| C | 4.855360  | -0.912104 | -0.187430 |
| C | 5.051246  | 0.407876  | -0.383651 |
| C | 4.093730  | 1.480779  | -0.207155 |
| C | 3.642276  | -1.565770 | 0.262366  |
| C | 2.761829  | 1.415232  | 0.000103  |
| C | 2.393063  | -1.073225 | 0.391722  |
| C | 1.866797  | 0.264022  | 0.106477  |
| H | 5.706825  | -1.570564 | -0.343480 |
| H | 6.047570  | 0.721975  | -0.686915 |
| H | 4.514450  | 2.481524  | -0.277743 |
| H | 3.767894  | -2.612423 | 0.532695  |
| H | 2.249436  | 2.373921  | 0.075683  |
| H | 1.657033  | -1.772631 | 0.779645  |
| C | 0.522878  | 0.494952  | 0.023061  |
| C | -0.522852 | -0.494868 | 0.023059  |
| H | 0.220502  | 1.531415  | -0.112258 |
| H | -0.220392 | -1.531304 | -0.112310 |
| C | -1.866774 | -0.263987 | 0.106468  |
| C | -2.761782 | -1.415223 | 0.000026  |
| C | -2.393079 | 1.073283  | 0.391604  |
| C | -4.093689 | -1.480812 | -0.207188 |
| H | -2.249352 | -2.373894 | 0.075580  |
| C | -3.642322 | 1.565768  | 0.262283  |
| H | -1.657051 | 1.772766  | 0.779393  |

|   |           |           |           |
|---|-----------|-----------|-----------|
| C | -5.051260 | -0.407953 | -0.383563 |
| H | -4.514376 | -2.481570 | -0.277773 |
| H | -3.767963 | 2.612443  | 0.532521  |
| H | -6.047604 | -0.722089 | -0.686728 |
| C | -4.855425 | 0.912028  | -0.187351 |
| H | -5.706946 | 1.570438  | -0.343306 |

Fig9b-s-cis-23

|   |           |           |           |
|---|-----------|-----------|-----------|
| C | -3.994285 | -1.076884 | 0.260814  |
| C | -3.025681 | -1.851537 | -0.272244 |
| C | -1.798276 | -1.410499 | -0.902219 |
| C | -4.024603 | 0.368895  | 0.339346  |
| C | -1.203927 | -0.201239 | -0.852211 |
| C | -3.021254 | 1.253025  | 0.159447  |
| C | -1.609364 | 1.016422  | -0.145169 |
| H | -4.878161 | -1.580875 | 0.645819  |
| H | -3.196245 | -2.925913 | -0.281866 |
| H | -1.284724 | -2.170182 | -1.487953 |
| H | -4.990224 | 0.791035  | 0.610144  |
| H | -0.276282 | -0.096084 | -1.411033 |
| H | -3.276531 | 2.303164  | 0.299130  |
| C | -0.717845 | 2.020222  | 0.098681  |
| C | 0.717842  | 2.020223  | -0.098677 |
| H | -1.133193 | 2.968418  | 0.442539  |
| H | 1.133191  | 2.968420  | -0.442531 |
| C | 1.609362  | 1.016421  | 0.145169  |
| C | 3.021252  | 1.253026  | -0.159447 |
| C | 1.203925  | -0.201242 | 0.852206  |
| C | 4.024602  | 0.368898  | -0.339345 |
| H | 3.276527  | 2.303165  | -0.299132 |



|   |          |           |           |
|---|----------|-----------|-----------|
| C | 1.798277 | -1.410501 | 0.902215  |
| H | 0.276277 | -0.096090 | 1.411024  |
| C | 3.994289 | -1.076881 | -0.260811 |
| H | 4.990222 | 0.791040  | -0.610144 |
| H | 1.284723 | -2.170186 | 1.487946  |
| H | 4.878167 | -1.580871 | -0.645812 |
| C | 3.025686 | -1.851536 | 0.272245  |
| H | 3.196253 | -2.925911 | 0.281869  |

Fig9b-TS-8a

|   |           |           |           |
|---|-----------|-----------|-----------|
| C | 3.735010  | -1.155051 | -0.146876 |
| C | 2.628490  | -1.900068 | 0.263593  |
| C | 1.405623  | -1.416398 | 0.718174  |
| C | 3.863653  | 0.226053  | -0.250902 |
| C | 0.841280  | -0.139945 | 0.655792  |
| C | 2.874089  | 1.201335  | -0.116786 |
| C | 1.504508  | 1.088595  | 0.129974  |
| H | 4.630429  | -1.729589 | -0.377335 |
| H | 2.772688  | -2.975771 | 0.329955  |
| H | 0.751688  | -2.163927 | 1.168930  |
| H | 4.851185  | 0.594993  | -0.516120 |
| H | 0.107067  | 0.070042  | 1.434705  |
| H | 3.211999  | 2.221568  | -0.302454 |
| C | 0.696634  | 2.228324  | -0.029163 |
| C | -0.696699 | 2.228417  | 0.029273  |
| H | 1.200054  | 3.186270  | -0.148070 |
| H | -1.200022 | 3.186422  | 0.148195  |
| C | -1.504644 | 1.088738  | -0.130320 |
| C | -2.874257 | 1.201343  | 0.116419  |
| C | -0.841355 | -0.139897 | -0.655806 |

|   |           |           |           |
|---|-----------|-----------|-----------|
| C | -3.863776 | 0.225898  | 0.250616  |
| H | -3.212202 | 2.221561  | 0.302081  |
| C | -1.405454 | -1.416397 | -0.717783 |
| H | -0.106892 | 0.070013  | -1.434498 |
| C | -3.734935 | -1.155237 | 0.146949  |
| H | -4.851373 | 0.594716  | 0.515770  |
| H | -0.751537 | -2.163866 | -1.168661 |
| H | -4.630259 | -1.729889 | 0.377499  |
| C | -2.628250 | -1.900156 | -0.263223 |
| H | -2.772335 | -2.975873 | -0.329583 |

Fig9b-TS-8b

|   |           |           |           |
|---|-----------|-----------|-----------|
| C | 3.551402  | -1.349919 | -0.198138 |
| C | 2.473734  | -1.824578 | -0.930556 |
| C | 1.315714  | -1.011976 | -0.944617 |
| C | 3.775922  | -0.000762 | 0.270146  |
| C | 1.083516  | -0.337116 | 0.247528  |
| C | 2.942768  | 1.097849  | 0.320292  |
| C | 1.507235  | 1.078777  | 0.253007  |
| H | 4.439704  | -1.980658 | -0.164793 |
| H | 2.614042  | -2.684525 | -1.584335 |
| H | 0.809025  | -0.738194 | -1.869291 |
| H | 4.824723  | 0.209913  | 0.473716  |
| H | 1.451121  | -0.872598 | 1.126702  |
| H | 3.418876  | 2.076558  | 0.382115  |
| C | 0.731573  | 2.198029  | 0.040017  |
| C | -0.660833 | 2.180822  | -0.231171 |
| H | 1.251320  | 3.146215  | -0.086709 |
| H | -1.076995 | 3.052406  | -0.733622 |
| C | -1.507484 | 1.122179  | 0.033127  |

|   |           |           |           |
|---|-----------|-----------|-----------|
| C | -2.820793 | 1.127585  | -0.519359 |
| C | -1.044462 | 0.080534  | 0.970634  |
| C | -3.725459 | 0.107518  | -0.665158 |
| H | -3.117683 | 2.082689  | -0.953268 |
| C | -1.581334 | -1.165611 | 1.192936  |
| C | -3.603937 | -1.247243 | -0.263902 |
| H | -4.640956 | 0.356671  | -1.195791 |
| H | -1.094501 | -1.741774 | 1.978079  |
| H | -4.403406 | -1.903809 | -0.601954 |
| C | -2.650853 | -1.822216 | 0.538775  |
| H | -2.782543 | -2.874109 | 0.779397  |
| H | -0.412985 | 0.467980  | 1.768395  |

Fig10-24

|   |           |           |           |
|---|-----------|-----------|-----------|
| C | 3.043646  | 1.066015  | 0.676679  |
| C | 3.043629  | 1.066037  | -0.676681 |
| C | 2.225320  | 0.281940  | -1.577455 |
| C | 2.225345  | 0.281875  | 1.577441  |
| C | 1.266671  | -0.644992 | -1.262400 |
| C | 1.266702  | -0.645032 | 1.262380  |
| C | 0.799552  | -1.097966 | -0.000027 |
| H | 3.745357  | 1.740378  | 1.163097  |
| H | 3.745330  | 1.740419  | -1.163087 |
| H | 2.395533  | 0.459364  | -2.635852 |
| H | 2.395581  | 0.459264  | 2.635842  |
| H | 0.771932  | -1.110463 | -2.114011 |
| H | 0.771975  | -1.110537 | 2.113979  |
| C | -0.272467 | -2.137476 | -0.000026 |
| C | -1.570200 | -1.832205 | -0.000002 |
| H | 0.027115  | -3.187133 | -0.000030 |

|   |           |           |           |
|---|-----------|-----------|-----------|
| C | -2.053633 | -0.438802 | 0.000009  |
| C | -2.330321 | 0.358662  | -1.166243 |
| C | -2.330281 | 0.358656  | 1.166272  |
| C | -2.745918 | 1.585689  | -0.736897 |
| C | -2.745802 | 1.585717  | 0.736945  |
| H | -3.024839 | 2.429637  | -1.356207 |
| H | -3.024653 | 2.429678  | 1.356267  |
| H | -2.318875 | -2.625565 | 0.000003  |
| H | -2.208989 | 0.023132  | -2.187579 |
| H | -2.208918 | 0.023121  | 2.187603  |

Fig11-SOSP

|   |           |           |           |
|---|-----------|-----------|-----------|
| C | 2.422721  | -1.560218 | 0.453647  |
| C | 3.197409  | -0.738823 | -0.300915 |
| C | 2.939152  | 0.641519  | -0.585812 |
| C | 1.166575  | -1.269612 | 1.072689  |
| C | 1.840881  | 1.400370  | -0.337785 |
| C | 0.325523  | -0.211489 | 0.893802  |
| C | 0.537230  | 1.049653  | 0.205550  |
| H | 2.805090  | -2.563191 | 0.633397  |
| H | 4.133526  | -1.136775 | -0.683028 |
| H | 3.756202  | 1.163390  | -1.081099 |
| H | 0.783180  | -2.050739 | 1.723622  |
| H | 1.907802  | 2.435516  | -0.667477 |
| H | -0.586974 | -0.247906 | 1.480926  |
| C | -0.385705 | 2.104673  | 0.296618  |
| C | -1.755509 | 1.817015  | 0.337595  |
| H | -0.017541 | 3.126196  | 0.246152  |
| C | -2.090089 | 0.578870  | -0.165829 |
| C | -3.129666 | -0.337489 | 0.210075  |

|   |           |           |           |
|---|-----------|-----------|-----------|
| C | -1.081845 | -0.175103 | -0.917380 |
| C | -2.741922 | -1.584754 | -0.216957 |
| C | -1.512464 | -1.479393 | -0.958413 |
| H | -3.286200 | -2.506988 | -0.043734 |
| H | -1.039311 | -2.292127 | -1.496202 |
| H | -2.488103 | 2.508840  | 0.746943  |
| H | -3.975039 | -0.099111 | 0.843680  |
| H | -0.386384 | 0.251583  | -1.624478 |

Fig15-s-trans-25

|   |           |           |           |
|---|-----------|-----------|-----------|
| C | 1.100147  | 0.177652  | 0.000006  |
| C | -0.234578 | 0.421888  | -0.000015 |
| C | -1.289315 | -0.555121 | 0.000041  |
| H | -0.553056 | 1.465336  | -0.000100 |
| C | -2.582469 | -0.191608 | -0.000042 |
| C | -3.984011 | -0.471069 | -0.000061 |
| C | -3.619154 | 0.797670  | -0.000168 |
| H | -1.043959 | -1.612166 | 0.000150  |
| C | 1.791232  | -1.111122 | 0.000085  |
| C | 3.124960  | -0.867266 | 0.000148  |
| H | 1.309991  | -2.081110 | 0.000112  |
| C | 3.347200  | 0.577316  | 0.000118  |
| H | 3.912037  | -1.612877 | 0.000237  |
| C | 2.144530  | 1.201411  | -0.000116 |
| H | 4.320796  | 1.053578  | 0.000166  |
| H | 1.955959  | 2.268658  | -0.000259 |
| H | -3.910100 | 1.836932  | -0.000282 |
| H | -4.782912 | -1.196850 | -0.000006 |

Fig15-s-cis-25

|   |           |           |           |
|---|-----------|-----------|-----------|
| C | 0.908858  | 0.560967  | -0.063362 |
| C | -0.086107 | 1.486830  | -0.061420 |
| C | -1.502599 | 1.307029  | -0.276640 |
| H | 0.216409  | 2.515731  | 0.138342  |
| C | -2.170293 | 0.169039  | -0.017269 |
| C | -2.247547 | -1.173554 | 0.464504  |
| C | -3.372297 | -0.597253 | 0.080353  |
| H | -2.082464 | 2.174986  | -0.577098 |
| C | 0.874126  | -0.851006 | -0.443219 |
| C | 2.119334  | -1.361460 | -0.270878 |
| H | 0.022129  | -1.362398 | -0.871011 |
| C | 3.001570  | -0.311370 | 0.230492  |
| H | 2.431068  | -2.375834 | -0.493730 |
| C | 2.290068  | 0.837032  | 0.334797  |
| H | 4.051136  | -0.444044 | 0.465638  |
| H | 2.643197  | 1.800551  | 0.683275  |
| H | -1.731871 | -2.038655 | 0.852022  |
| H | -4.440265 | -0.667863 | -0.061591 |

Fig15-TS-9a

|   |           |           |           |
|---|-----------|-----------|-----------|
| C | 0.628259  | 0.847057  | 0.300282  |
| C | -0.477123 | 1.733650  | 0.166132  |
| C | -1.778046 | 1.264125  | 0.101165  |
| H | -0.300180 | 2.807955  | 0.109794  |
| C | -1.879905 | -0.113787 | -0.152255 |
| C | -0.961578 | -1.094030 | -0.588765 |
| C | -2.254546 | -1.420231 | -0.214171 |
| H | -2.648458 | 1.902055  | 0.193831  |
| C | 0.561561  | -0.472085 | 0.892082  |
| C | 1.719308  | -1.165459 | 0.491741  |

|   |           |           |           |
|---|-----------|-----------|-----------|
| H | -0.048431 | -0.728370 | 1.751071  |
| C | 2.436208  | -0.365245 | -0.413854 |
| H | 2.018413  | -2.146137 | 0.844468  |
| C | 1.793731  | 0.877968  | -0.500500 |
| H | 3.347034  | -0.644280 | -0.929555 |
| H | 2.083460  | 1.698622  | -1.148507 |
| H | -2.987468 | -2.177082 | 0.018458  |
| H | -0.191586 | -1.264538 | -1.330705 |

Fig15-TS-9b

|   |           |           |           |
|---|-----------|-----------|-----------|
| C | -0.706931 | 0.711176  | -0.313980 |
| C | 0.356973  | 1.636026  | -0.298094 |
| C | 1.711257  | 1.362544  | -0.166632 |
| H | 0.075417  | 2.678656  | -0.149962 |
| C | 2.024239  | 0.017368  | 0.041816  |
| C | 1.502777  | -1.275757 | -0.234646 |
| C | 2.404943  | -1.052595 | 0.787448  |
| H | 2.395948  | 2.145044  | 0.138737  |
| C | -0.686685 | -0.718797 | -0.668350 |
| C | -1.882747 | -1.268336 | -0.160950 |
| H | -0.302935 | -1.040050 | -1.629148 |
| C | -2.589772 | -0.274707 | 0.522420  |
| H | -2.230635 | -2.278381 | -0.346076 |
| C | -1.899829 | 0.939887  | 0.397708  |
| H | -3.521509 | -0.413481 | 1.059324  |
| H | -2.159839 | 1.871965  | 0.888637  |
| H | 2.961392  | -1.437323 | 1.629392  |
| H | 1.376816  | -1.987278 | -1.031343 |

Fig16-s-cis-26

|   |           |           |           |
|---|-----------|-----------|-----------|
| C | -2.722910 | 0.363818  | 0.020586  |
| C | -1.373604 | 0.207611  | -0.111423 |
| C | -0.708811 | -1.063350 | -0.149323 |
| C | 0.625604  | -1.312072 | -0.141133 |
| C | 1.654293  | -0.310079 | -0.025740 |
| C | 2.977272  | -0.577148 | -0.052503 |
| H | -0.785008 | 1.113317  | -0.219326 |
| H | -1.348853 | -1.943189 | -0.226458 |
| H | 0.958140  | -2.343963 | -0.226084 |
| H | 1.348767  | 0.726020  | 0.101389  |
| C | 3.958978  | 0.448092  | 0.075948  |
| N | 4.763552  | 1.279638  | 0.178917  |
| N | -3.365025 | 1.567676  | -0.214003 |
| H | -4.072199 | 1.809092  | 0.468602  |
| H | -2.754027 | 2.341118  | -0.434883 |
| N | -3.610217 | -0.626336 | 0.402056  |
| H | -4.464802 | -0.663200 | -0.138021 |
| H | -3.211370 | -1.535328 | 0.581206  |
| H | 3.346246  | -1.591945 | -0.173686 |

Fig16-TS-10a

|   |           |           |           |
|---|-----------|-----------|-----------|
| C | -0.002731 | 1.179604  | 0.131210  |
| C | -1.426226 | 1.181701  | -0.300054 |
| C | -2.224829 | 0.089492  | -0.264885 |
| C | -1.877820 | -1.257401 | 0.149106  |
| C | -0.603841 | -1.750822 | 0.102922  |
| C | 0.425659  | -1.107840 | -0.643067 |
| H | 0.166592  | -0.674165 | -1.603672 |
| H | -1.842729 | 2.167357  | -0.486645 |
| H | -3.275443 | 0.272290  | -0.487234 |



|   |           |           |           |
|---|-----------|-----------|-----------|
| H | -2.684760 | -1.863597 | 0.551153  |
| H | -0.374272 | -2.657316 | 0.666118  |
| C | 1.763977  | -1.037121 | -0.263732 |
| N | 2.842299  | -0.746178 | 0.102467  |
| N | 0.929007  | 1.772070  | -0.637049 |
| H | 0.706333  | 1.815786  | -1.621682 |
| H | 1.899233  | 1.524672  | -0.440463 |
| N | 0.264223  | 1.022881  | 1.439423  |
| H | 1.233251  | 0.851194  | 1.692388  |
| H | -0.402046 | 0.436696  | 1.927151  |

Fig16-TS-10b

|   |           |           |           |
|---|-----------|-----------|-----------|
| C | 0.438754  | -1.021599 | 0.424228  |
| C | -0.577318 | -1.864899 | -0.056985 |
| C | -1.887885 | -1.441690 | 0.000957  |
| C | -2.242240 | -0.066738 | -0.049561 |
| C | -1.461214 | 1.053813  | -0.223176 |
| C | -0.037533 | 1.260884  | -0.018880 |
| H | -0.337363 | -2.815322 | -0.532783 |
| H | -2.689792 | -2.150094 | -0.186489 |
| H | -3.303097 | 0.111761  | -0.223798 |
| H | -1.922925 | 1.874063  | -0.773068 |
| H | 0.258744  | -0.580493 | 1.393297  |
| C | 1.806714  | -1.112510 | 0.064548  |
| N | 2.924528  | -1.029528 | -0.254810 |
| N | 0.689510  | 1.686016  | -1.093718 |
| N | 0.434295  | 1.707422  | 1.199129  |
| H | 1.632839  | 2.011557  | -0.930754 |
| H | 0.582334  | 1.137433  | -1.933651 |
| H | 1.400082  | 1.481855  | 1.415141  |

H      -0.194825   1.538310   1.971099

## 2. References for Supporting Information

- 1 Frisch, M. J.; Trucks, G. W.; Schlegel, H. B.; Scuseria, G. E.; Robb, M. A.; Cheeseman, J. R.; Scalmani, G.; Barone, V.; Petersson, G. A.; Nakatsuji, H.; Li, X.; Caricato, M.; Marenich, A. V.; Bloino, J.; Janesko, B. G.; Gomperts, R.; Mennucci, B.; Hratchian, H. P.; Ortiz, J. V.; Izmaylov, A. F.; Sonnenberg, J. L.; Williams; Ding, F.; Lipparini, F.; Egidi, F.; Goings, J.; Peng, B.; Petrone, A.; Henderson, T.; Ranasinghe, D.; Zakrzewski, V. G.; Gao, J.; Rega, N.; Zheng, G.; Liang, W.; Hada, M.; Ehara, M.; Toyota, K.; Fukuda, R.; Hasegawa, J.; Ishida, M.; Nakajima, T.; Honda, Y.; Kitao, O.; Nakai, H.; Vreven, T.; Throssell, K.; Montgomery Jr., J. A.; Peralta, J. E.; Ogliaro, F.; Bearpark, M. J.; Heyd, J. J.; Brothers, E. N.; Kudin, K. N.; Staroverov, V. N.; Keith, T. A.; Kobayashi, R.; Normand, J.; Raghavachari, K.; Rendell, A. P.; Burant, J. C.; Iyengar, S. S.; Tomasi, J.; Cossi, M.; Millam, J. M.; Klene, M.; Adamo, C.; Cammi, R.; Ochterski, J. W.; Martin, R. L.; Morokuma, K.; Farkas, O.; Foresman, J. B.; Fox, D. J. *Gaussian 16 Rev. C.01*, Wallingford, CT, 2016.
- 2 Chai, J.-D.; Head-Gordon, M. Long-range corrected hybrid density functionals with damped atom–atom dispersion corrections. *PCCP* **2008**, *10*, 6615-6620.
- 3 Dunning, T. Gaussian-Basis Sets for Use in Correlated Molecular Calculations .1. The Atoms Boron Through Neon and Hydrogen. *J. Chem. Phys.* **1989**, *90*, 1007-1023.
- 4 R. S. Paton, J. Rodríguez-Guerra and J. I. Funes, GoodVibes: version 3.0.0; Zenodo, 2019; DOI: 10.5281/zenodo.3346166.
- 5 The PyMOL Molecular Graphics System, Version 2. Schrödinger, LLC.
- 6 GaussView, Version 6, Roy. Dennington, Todd A. Keith and John M. Millam, Semichem Inc., Shawnee Mission, KS, 2016.
